# Supplementary material for: Facile synthesis of meso-structured Pd/FeOx and its highly catalytic performance for low temperature CO oxidation under ambient conditions
Source: Royal Society of Chemistry journal article supplement (doi:10.1039/c5ra01118c), 2015-01-01
Supplement: c5ra01118c1.pdf [file c5ra01118c1.pdf]

## Supporting information

# Facile Synthesis of Meso-structured Pd/FeO<sub>x</sub> and Its Highly Catalytic performance for Low Temperature CO Oxidation under Ambient Condition

Liang Li\*, Gengnan Li<sup>†</sup>, Yuan Yuan<sup>†</sup> and Yongsheng Li

\* Key Laboratory for Ultrafine Materials of Ministry of Education, School of Materials Science and Engineering, East China University of Science and Technology, Shanghai 200237, China

E-mail: [liliang@ecust.edu.cn](mailto:liliang@ecust.edu.cn) Tel: 021-64252599; Fax: 021-64250740

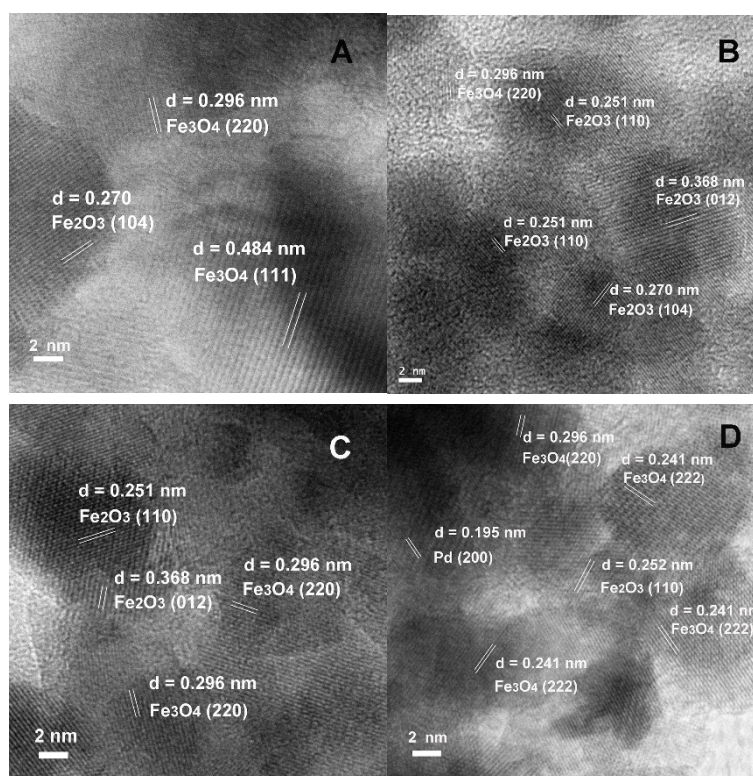

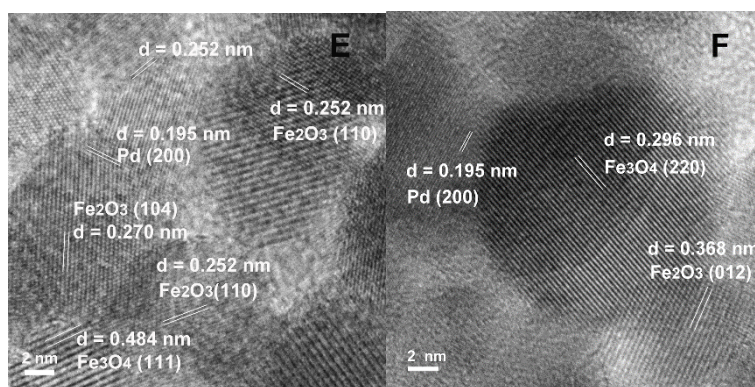

Fig. S1 HRTEM images of Pd/FeO<sub>x</sub> materials with different Pd loading content: 0 wt% (A), 1.1wt% (B), 3.3wt% (C), 5.8wt% (D), 7.1wt% (E) and 9.0wt% (F)

**Table 1 The assignment of Fe 2p<sub>2/3</sub> photoelectron peaks of the samples.**

| Samples                                                           | Fe <sup>2+</sup> oct | %    | Fe <sup>3+</sup> oct | %    | Fe <sup>3+</sup> tet | %    |
|-------------------------------------------------------------------|----------------------|------|----------------------|------|----------------------|------|
| FeO <sub>x</sub> support                                          | 709.7eV              | 14.4 | 710.8eV              | 62.5 | 713.6eV              | 23.1 |
| 7.1 wt% Pd/FeO <sub>x</sub> (no pretest)                          | 709.6eV              | 17.3 | 710.7ev              | 59.9 | 713.4eV              | 22.8 |
| 7.1 wt% Pd/FeO <sub>x</sub><br>(pretest under dry condition)      | 709.7eV              | 18.0 | 710.8eV              | 60.5 | 713.5eV              | 21.5 |
| 7.1 wt% Pd/FeO <sub>x</sub><br>(pretest under moisture condition) | 709.7eV              | 20.9 | 710.8eV              | 58.1 | 713.5eV              | 21.0 |

**Table 2 The assignment of O1s photoelectron peaks of the samples.**

| Samples                                                           | O <sub>latt</sub> | %    | O <sub>ads</sub> | %    |
|-------------------------------------------------------------------|-------------------|------|------------------|------|
| FeO <sub>x</sub> support                                          | 529.6 eV          | 62.7 | 531.4 eV         | 37.3 |
| 7.1 wt% Pd/FeO <sub>x</sub> (no pretest)                          | 529.6 eV          | 56.2 | 531.5 eV         | 43.8 |
| 7.1 wt% Pd/FeO <sub>x</sub><br>(pretest under dry condition)      | 529.6 eV          | 59.6 | 531.3 eV         | 40.4 |
| 7.1 wt% Pd/FeO <sub>x</sub><br>(pretest under moisture condition) | 529.6 eV          | 58.2 | 531.4 eV         | 41.8 |

**Table 3 The assignment of Pd 3d photoelectron peaks of the samples.**

| Samples                                                           | Pd <sup>0</sup> |          | %    | Pd <sup>2+</sup> |          | %    |
|-------------------------------------------------------------------|-----------------|----------|------|------------------|----------|------|
| 7.1 wt% Pd/FeO <sub>x</sub> (no pretest)                          | 335.1 eV        | 340.4 eV | 78.1 | 336.6 eV         | 342.1 eV | 21.9 |
| 7.1 wt% Pd/FeO <sub>x</sub><br>(pretest under dry condition)      | 335.1 eV        | 340.3 eV | 67.7 | 336.7 eV         | 342.1 eV | 32.3 |
| 7.1 wt% Pd/FeO <sub>x</sub><br>(pretest under moisture condition) | 335.0 eV        | 340.4 eV | 57.3 | 336.7 eV         | 342.1 eV | 42.7 |

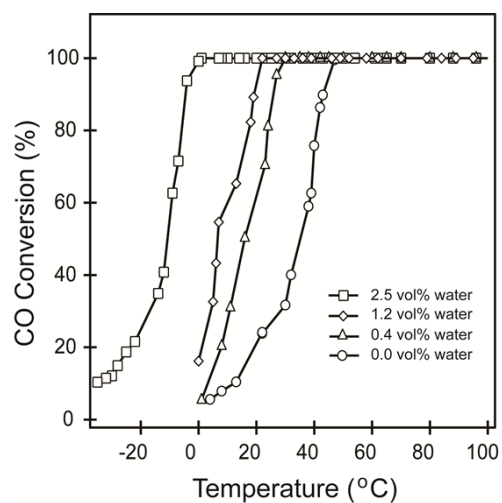

Fig. S2 The effect of water on the catalytic activity for CO oxidation over 7.1wt% Pd loaded catalyst.
